# Supplementary material for: The effectiveness of ultrasound in the detection of fractures in adults with suspected upper or lower limb injury: a systematic review and subgroup meta-analysis
Source: PubMed Central journal article supplement (PMC6350304; doi:10.1186/s12873-019-0226-5), 2019-01-28
Supplement: 12873_2019_226_MOESM2_ESM.pdf [file 12873_2019_226_MOESM2_ESM.pdf]

**Additional file 2: Data extraction form:**

**a) Source:**

|                                        |
|----------------------------------------|
| Full study citation                    |
|                                        |
| Study ID (e.g. Smith 2001)             |
|                                        |
| Review author ID (date form completed) |
|                                        |
| Link to full text                      |
|                                        |

**b) Study eligibility:**

| Study characteristics | Inclusion criteria                                                                                                                                                                                                                                                                                                                                                                                                                                                           | Yes | No                                                                                                                                                                                                                                                                                                                                                                                                                                                                                             | Unclear | Location in text |
|-----------------------|------------------------------------------------------------------------------------------------------------------------------------------------------------------------------------------------------------------------------------------------------------------------------------------------------------------------------------------------------------------------------------------------------------------------------------------------------------------------------|-----|------------------------------------------------------------------------------------------------------------------------------------------------------------------------------------------------------------------------------------------------------------------------------------------------------------------------------------------------------------------------------------------------------------------------------------------------------------------------------------------------|---------|------------------|
| Type of study         | Prospective observational study<br>Full text                                                                                                                                                                                                                                                                                                                                                                                                                                 |     |                                                                                                                                                                                                                                                                                                                                                                                                                                                                                                |         |                  |
| Participants/setting  | Human<br>Patients present (clinical study)                                                                                                                                                                                                                                                                                                                                                                                                                                   |     |                                                                                                                                                                                                                                                                                                                                                                                                                                                                                                |         |                  |
| Outcome measures      | Diagnostic accuracy                                                                                                                                                                                                                                                                                                                                                                                                                                                          |     |                                                                                                                                                                                                                                                                                                                                                                                                                                                                                                |         |                  |
| Decision              | <input type="checkbox"/> Included<br><input type="checkbox"/> Excluded                                                                                                                                                                                                                                                                                                                                                                                                       |     |                                                                                                                                                                                                                                                                                                                                                                                                                                                                                                |         |                  |
| Reason for exclusion  | <u>Study type</u><br><input type="checkbox"/> Selected case series<br><input type="checkbox"/> Non-clinical study<br><input type="checkbox"/> Literature review<br><input type="checkbox"/> Conference proceeding<br><input type="checkbox"/> Full text not available<br><u>Procedure</u><br><input type="checkbox"/> Therapeutic ultrasonography<br><u>Aims/outcomes</u><br><input type="checkbox"/> Fracture treatment<br><input type="checkbox"/> Bone density assessment |     | <u>Participants</u><br><input type="checkbox"/> Non-human subjects<br><input type="checkbox"/> Simulated patients<br><input type="checkbox"/> Simulated fractures<br><input type="checkbox"/> Non-blinded ultrasound operators<br><input type="checkbox"/> Non-blinded image interpretation<br><input type="checkbox"/> Exclusively paediatric patients<br><input type="checkbox"/> Mixed paediatric and adult populations (where adult and paediatric groups cannot be separately identified) |         |                  |
| Notes                 |                                                                                                                                                                                                                                                                                                                                                                                                                                                                              |     |                                                                                                                                                                                                                                                                                                                                                                                                                                                                                                |         |                  |

**DO NOT PROCEED IF STUDY IS EXCLUDED FROM REVIEW**

### 3. Data extraction:

| c) Methods:                                                  |                    |  |
|--------------------------------------------------------------|--------------------|--|
| <i>Criteria</i>                                              | <i>Description</i> |  |
| Study design                                                 |                    |  |
| Total study duration                                         |                    |  |
| Ultrasound operators                                         |                    |  |
| Diagnostic image interpreters                                |                    |  |
| Statistical data analysis                                    |                    |  |
| d) Participants:                                             |                    |  |
| <i>Criteria</i>                                              | <i>Description</i> |  |
| Participant characteristics                                  | Total number       |  |
|                                                              | Age                |  |
|                                                              | Sex                |  |
|                                                              | Setting            |  |
|                                                              | Country            |  |
| Diagnostic criteria                                          | Type of fracture   |  |
|                                                              | Inclusion criteria |  |
|                                                              | Exclusion criteria |  |
| e) Outcomes:                                                 |                    |  |
| Outcomes measured<br>(name, definition, unit of measurement) |                    |  |
| f) Results:                                                  |                    |  |
| <i>Primary outcomes</i>                                      | <i>Description</i> |  |
| Sensitivity                                                  |                    |  |
| Specificity                                                  |                    |  |
| Negative predictive value                                    |                    |  |
| Positive predictive value                                    |                    |  |
| <i>Secondary outcomes</i>                                    |                    |  |
| Patient management                                           |                    |  |
| Comparative time to diagnosis                                |                    |  |
| User perspectives                                            |                    |  |
| f) Miscellaneous                                             |                    |  |
| <i>Criteria</i>                                              | <i>Description</i> |  |
| Funding source                                               |                    |  |
| Key conclusions by study authors                             |                    |  |
