# Supplementary material for: The effectiveness of ultrasound in the detection of fractures in adults with suspected upper or lower limb injury: a systematic review and subgroup meta-analysis
Source: PubMed Central journal article supplement (PMC6350304; doi:10.1186/s12873-019-0226-5), 2019-01-28
Supplement: 12873_2019_226_MOESM3_ESM.pdf [file 12873_2019_226_MOESM3_ESM.pdf]

**Additional file 3: Characteristics of Included Studies:**

| Study (ref)       | Location    | (n) | Injury site                  | Intervention | Control                  | Outcomes                                                        |
|-------------------|-------------|-----|------------------------------|--------------|--------------------------|-----------------------------------------------------------------|
| Aksay (40)        | Turkey      | 119 | Proximal and middle phalanx  | PoCUS        | Radiography              | Sensitivity; specificity; PPV; NPV; LR(+); LR(-)                |
| Tollefson (45)    | USA         | 50  | Foot and/or ankle            | PoCUS        | Radiography              | Sensitivity; specificity; NPV; PPV                              |
| Aksay (39)        | Turkey      | 81  | 5 <sup>th</sup> metacarpus   | PoCUS        | Radiography              | Sensitivity; specificity; PPV; NPV; LR(+); LR(-)                |
| Atilla (38)       | Turkey      | 246 | Ankle and/or foot            | PoCUS        | Radiography              | Sensitivity; specificity                                        |
| Yesilaras (35)    | Turkey      | 84  | 5 <sup>th</sup> metatarsus   | PoCUS        | Radiography              | Sensitivity; specificity; LR(+); LR(-); intraclass correlation  |
| Bolandparvaz (41) | Iran        | 80  | Long bone                    | PoCUS        | Radiography              | Sensitivity; specificity; PPV; NPV; interrater reliability      |
| Ekinci (19)       | Turkey      | 131 | Foot and/or ankle            | PoCUS        | Radiography              | Sensitivity; specificity; PPV; NPV; patient satisfaction        |
| Platon (27)       | Switzerland | 62  | Scaphoid                     | PoCUS        | CT scan                  | Sensitivity; specificity; PPV; NPV; high vs. low-risk fractures |
| Weinberg (28)     | USA         | 212 | Not specified                | PoCUS        | Radiography <sup>1</sup> | Sensitivity; specificity; LR(-); LR(+); pain; reliability       |
| Safran (31)       | Israel      | 30  | Hip                          | PoCUS        | MRI                      | Sensitivity; specificity; NPV; PPV                              |
| Tayal (43)        | USA         | 78  | Metacarpus; phalanx          | PoCUS        | Radiography              | Sensitivity; specificity; PPV; NPV; speed of examination        |
| Fusetti (18)      | Switzerland | 24  | Scaphoid                     | HSR-US       | CT scan                  | Sensitivity; specificity; PPV; NPV; index of suspicion          |
| Marshburn (32)    | USA         | 58  | Humerus; femur               | PoCUS        | Radiography <sup>2</sup> | False-positive; false-negative; sensitivity; specificity        |
| Herneth (30)      | Austria     | 15  | Scaphoid                     | HSR-US       | MRI                      | Accuracy; sensitivity; specificity; PPV; NPV                    |
| Čičak (46)        | Croatia     | 61  | Shoulder (Hill-Sachs lesion) | PoCUS        | Surgical findings        | Sensitivity; specificity; accuracy; false-negative              |

<sup>1</sup>CT scan used as diagnostic modality comparison for skull and mandible fractures (gold standard)

<sup>2</sup>CT scan used if plain radiography was equivocal

| Study (ref)      | Location      | (n) | Injury site                     | Intervention | Control                  | Outcomes                                                    |
|------------------|---------------|-----|---------------------------------|--------------|--------------------------|-------------------------------------------------------------|
| Farin (25)       | Finland       | 86  | Shoulder<br>(Hill-Sachs lesion) | PoCUS        | Double-contrast CTA      | Sensitivity; specificity; accuracy                          |
| Banal (29)       | France        | 37  | Metatarsus<br>(stress #)        | PoCUS        | MRI                      | Sensitivity; specificity; PPV; NPV; LR(+); LR(-)            |
| Gungor (37)      | Turkey        | 45  | Distal phalanx                  | PoCUS        | Radiography              | False-positive; false-negative; sensitivity; specificity    |
| Kocaoğlu (36)    | Turkey        | 96  | Metacarpus                      | PoCUS        | Radiography              | Sensitivity; specificity; PPV; NPV                          |
| Sivrikaya (33)   | Turkey        | 90  | Radius; ulna                    | PoCUS        | Radiography <sup>3</sup> | Sensitivity; specificity; LR(+); LR(-)                      |
| Kilic (26)       | Turkey        | 92  | Patella                         | PoCUS        | CT scan                  | Sensitivity; specificity                                    |
| Javadzadeh (42)  | Iran          | 260 | Distal forearm; phalanx; wrist  | PoCUS        | Radiography              | Sensitivity; specificity; PPV; NPV                          |
| Dulchavsky (48)  | USA           | 95  | Upper or lower limb             | PoCUS        | Radiography              | Sensitivity; specificity                                    |
| Hedelin (44)     | Sweden        | 122 | Ankle                           | PoCUS        | Radiography              | Sensitivity; specificity; PPV; NPV; accuracy; gap in bone   |
| Dallaudière (34) | South America | 83  | Not specified                   | PoCUS        | Radiography              | Sensitivity; specificity                                    |
| Lau (47)         | USA           | 23  | Distal radius                   | PoCUS        | Radiography              | Sensitivity; specificity; interrater/intrarater reliability |

<sup>3</sup>CT scan used if inconsistency observed between PoCUS and plain radiography
