# Supplementary material for: The effectiveness of ultrasound in the detection of fractures in adults with suspected upper or lower limb injury: a systematic review and subgroup meta-analysis
Source: PubMed Central journal article supplement (PMC6350304; doi:10.1186/s12873-019-0226-5), 2019-01-28
Supplement: 12873_2019_226_MOESM5_ESM.pdf [file 12873_2019_226_MOESM5_ESM.pdf]

**Summary of Critical Appraisals:** Cochrane Handbook Risk of Bias Summary, which lists individual study bias [32]. Figure constructed using *Review Manager*.

|                   | <u>Risk of Bias</u> |            |                    |                 | <u>Applicability Concerns</u> |            |                    |
|-------------------|---------------------|------------|--------------------|-----------------|-------------------------------|------------|--------------------|
|                   | Patient Selection   | Index Test | Reference Standard | Flow and Timing | Patient Selection             | Index Test | Reference Standard |
| Aksay 2013        | +                   | ?          | +                  | ?               | +                             | +          | +                  |
| Aksay 2016        | +                   | ?          | +                  | ?               | +                             | +          | +                  |
| Atila 2014        | +                   | ?          | +                  | ?               | +                             | +          | +                  |
| Banal 2009        | ?                   | ?          | +                  | +               | +                             | +          | +                  |
| Bolandparvaz 2013 | ?                   | ?          | ?                  | -               | +                             | +          | +                  |
| Cicak 1998        | ?                   | ?          | +                  | -               | -                             | +          | +                  |
| Dallaudiere 2015  | ?                   | ?          | ?                  | ?               | +                             | +          | +                  |
| Dulchavsky 2002   | ?                   | ?          | ?                  | ?               | +                             | +          | +                  |
| Ekinci 2013       | ?                   | ?          | +                  | ?               | +                             | +          | +                  |
| Farin 1996        | -                   | ?          | +                  | -               | -                             | +          | +                  |
| Fusetti 2005      | ?                   | ?          | +                  | +               | +                             | +          | +                  |
| Gungor 2016       | ?                   | ?          | +                  | ?               | +                             | +          | +                  |
| Hedelin 2013      | ?                   | ?          | +                  | ?               | +                             | +          | +                  |
| Herneth 2001      | ?                   | ?          | +                  | ?               | +                             | +          | +                  |
| Javadzadeh 2013   | ?                   | ?          | +                  | ?               | +                             | +          | +                  |
| Kilic 2016        | ?                   | ?          | +                  | ?               | +                             | +          | +                  |
| Kocaoglu 2016     | ?                   | ?          | +                  | ?               | +                             | +          | +                  |
| Lau 2017          | ?                   | ?          | +                  | ?               | +                             | +          | +                  |
| Marshburn 2004    | ?                   | ?          | +                  | ?               | +                             | +          | +                  |
| Platon 2010       | ?                   | ?          | +                  | ?               | +                             | +          | +                  |
| Safran 2009       | +                   | ?          | +                  | +               | +                             | +          | +                  |
| Sivrikaya 2016    | ?                   | ?          | +                  | ?               | +                             | +          | +                  |
| Tayal 2007        | ?                   | ?          | +                  | ?               | +                             | +          | +                  |
| Tollefson 2016    | -                   | ?          | +                  | ?               | +                             | +          | +                  |
| Weinberg 2010     | ?                   | ?          | +                  | ?               | +                             | +          | +                  |
| Yesilaras 2013    | ?                   | ?          | +                  | ?               | +                             | +          | +                  |

  

|                                                                                                 |                                                                                                    |                                                                                                |
|-------------------------------------------------------------------------------------------------|----------------------------------------------------------------------------------------------------|------------------------------------------------------------------------------------------------|
|  <b>High</b> |  <b>Unclear</b> |  <b>Low</b> |
|-------------------------------------------------------------------------------------------------|----------------------------------------------------------------------------------------------------|------------------------------------------------------------------------------------------------|
